# Supplementary material for: Identification of a small molecule inhibitor that stalls splicing at an early step of spliceosome activation
Source: PubMed Central journal article supplement (PMC5354520; doi:10.7554/elife.23533), 2017-03-16

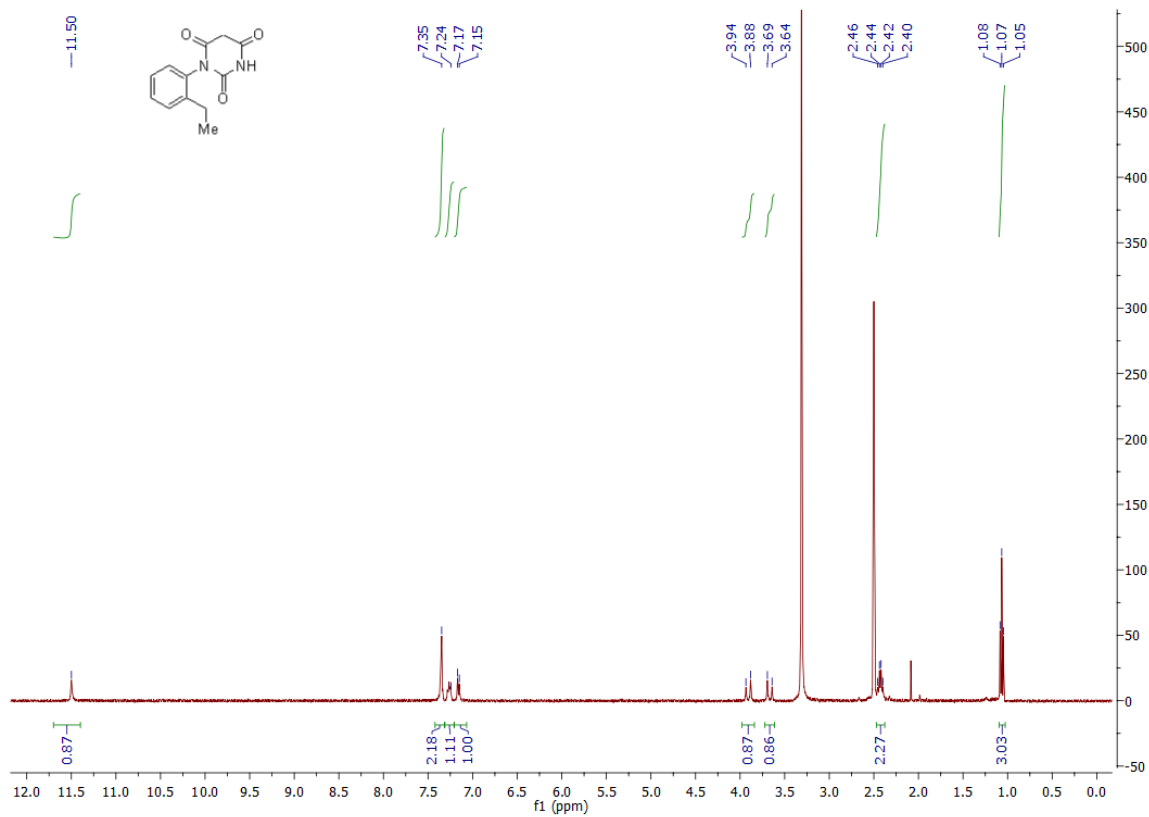

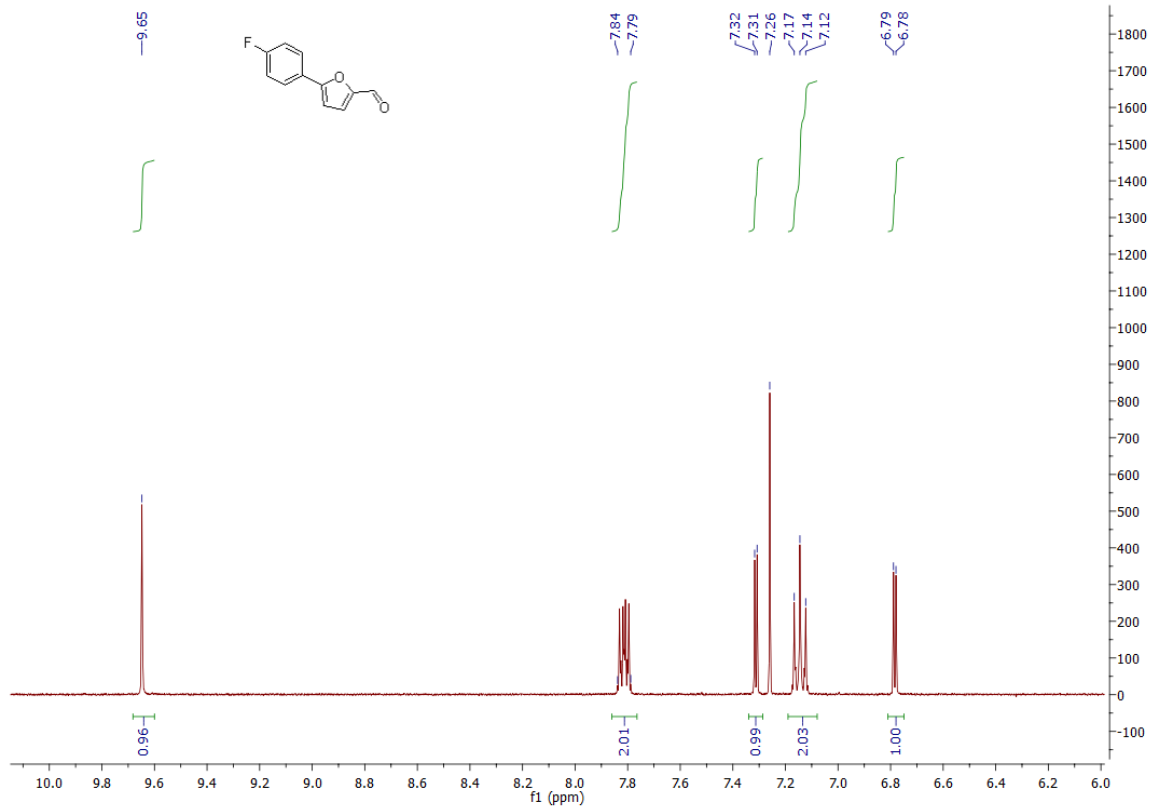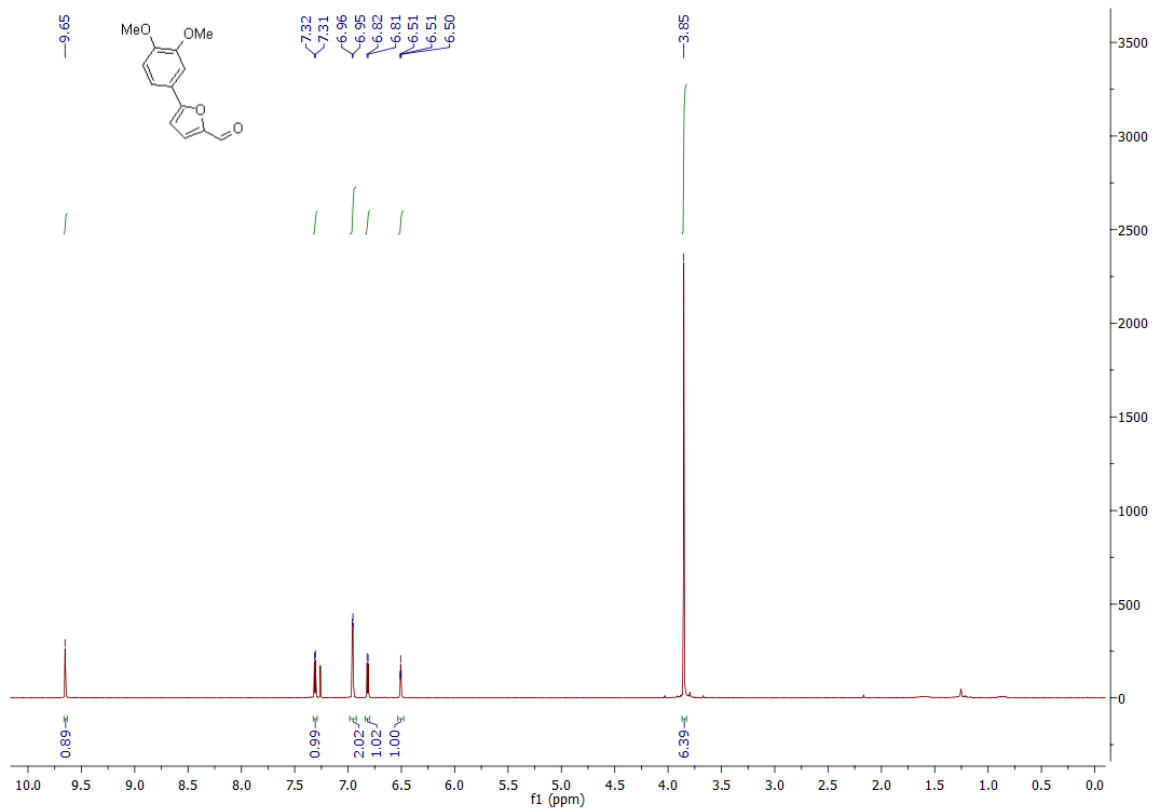

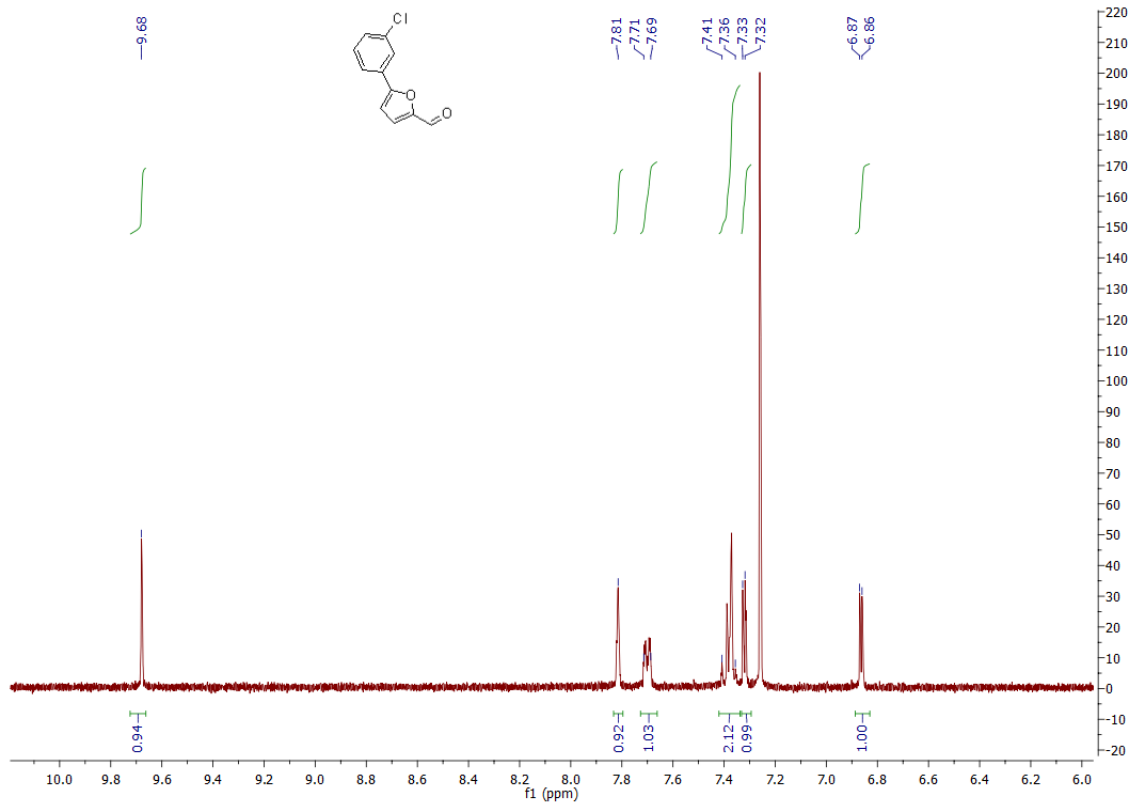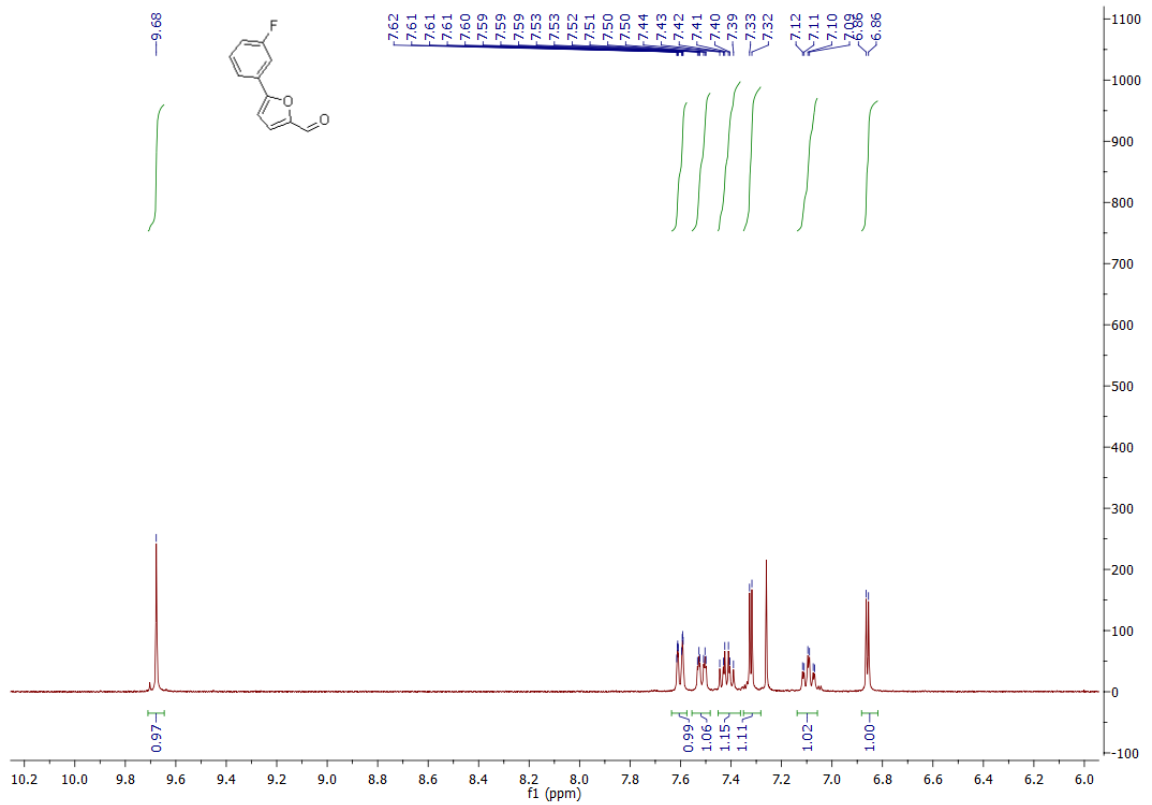

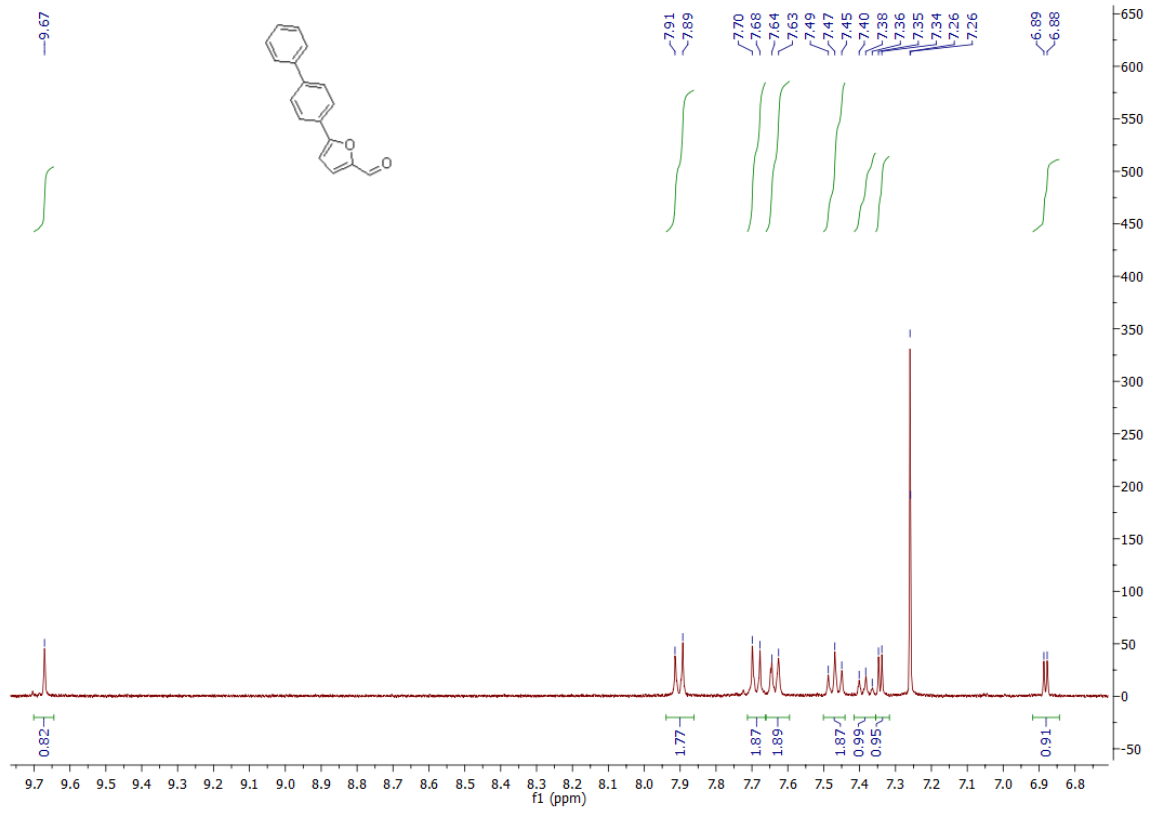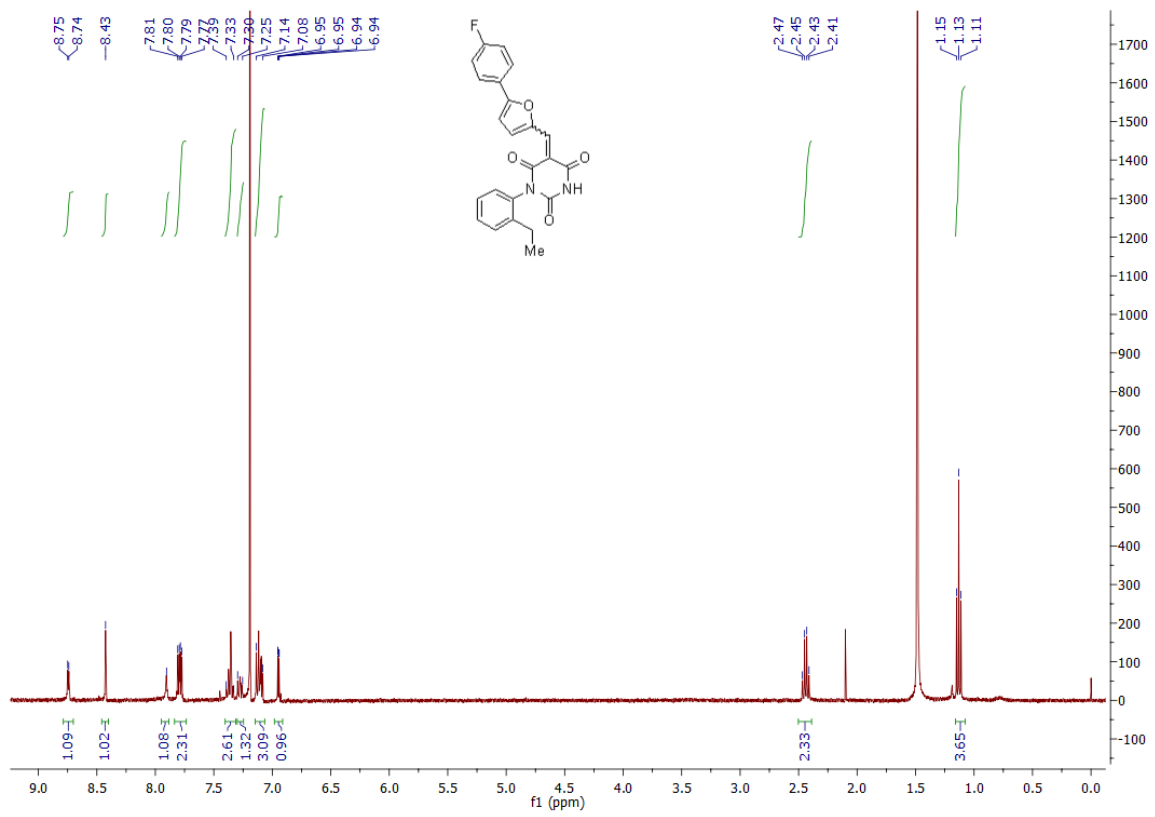

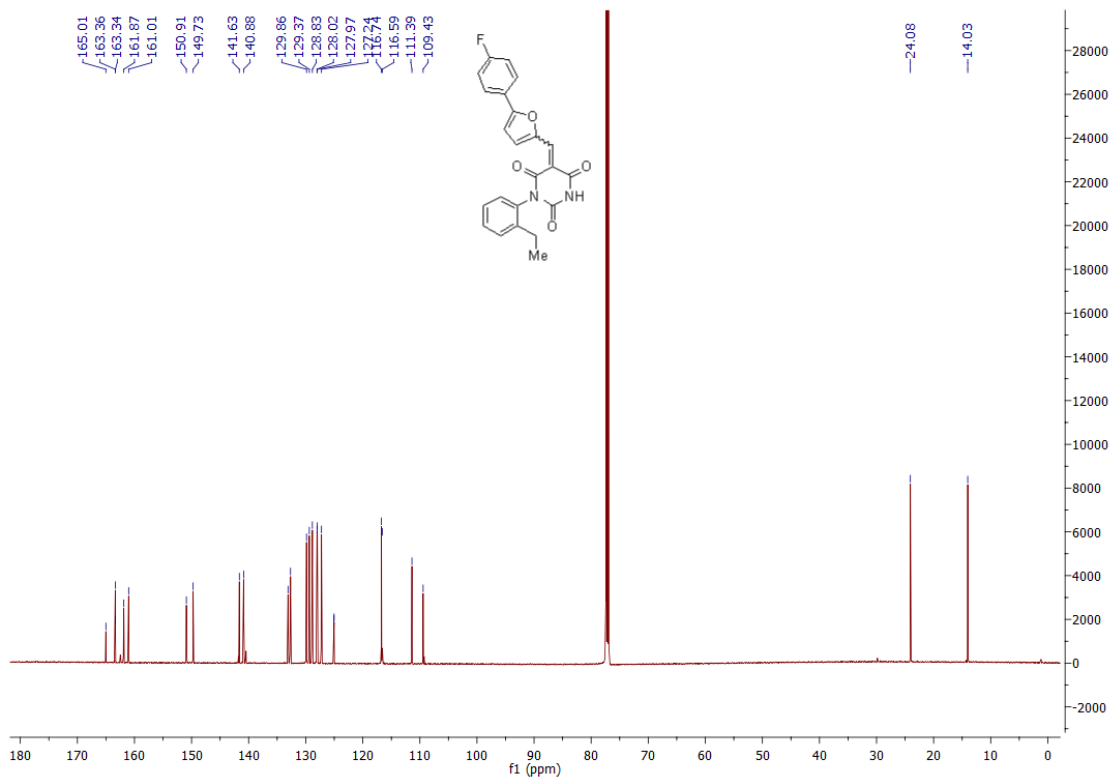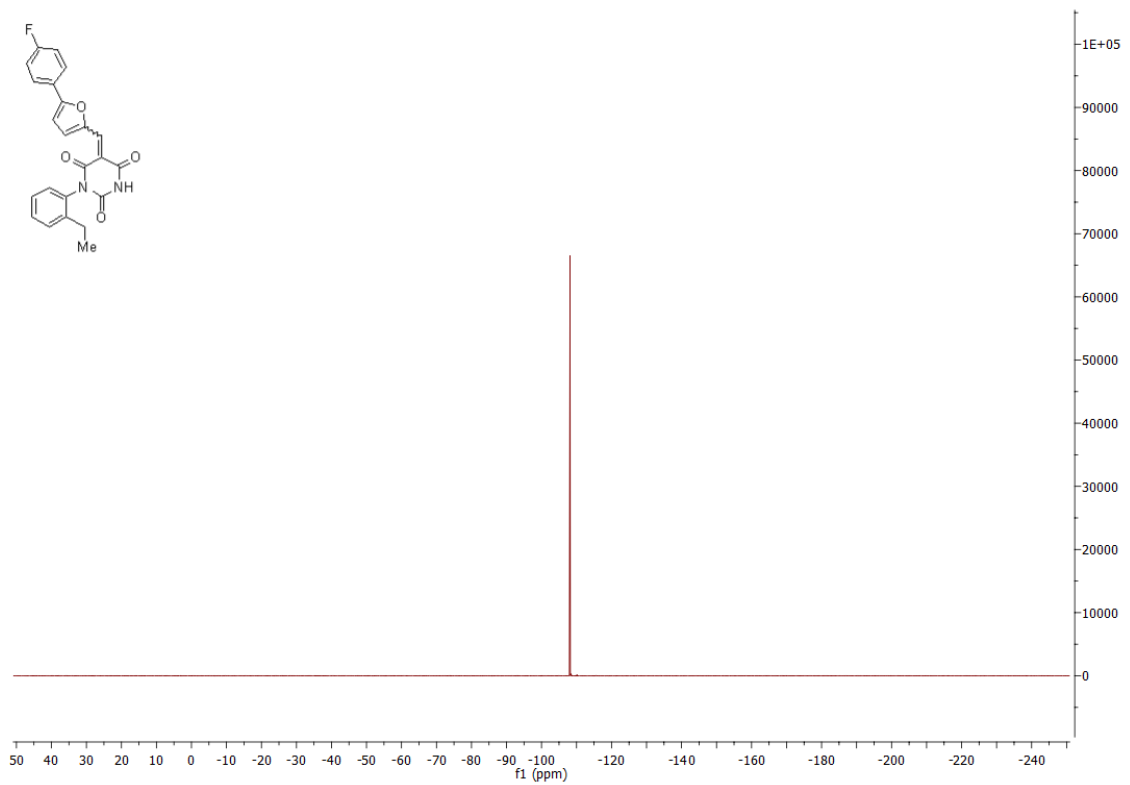

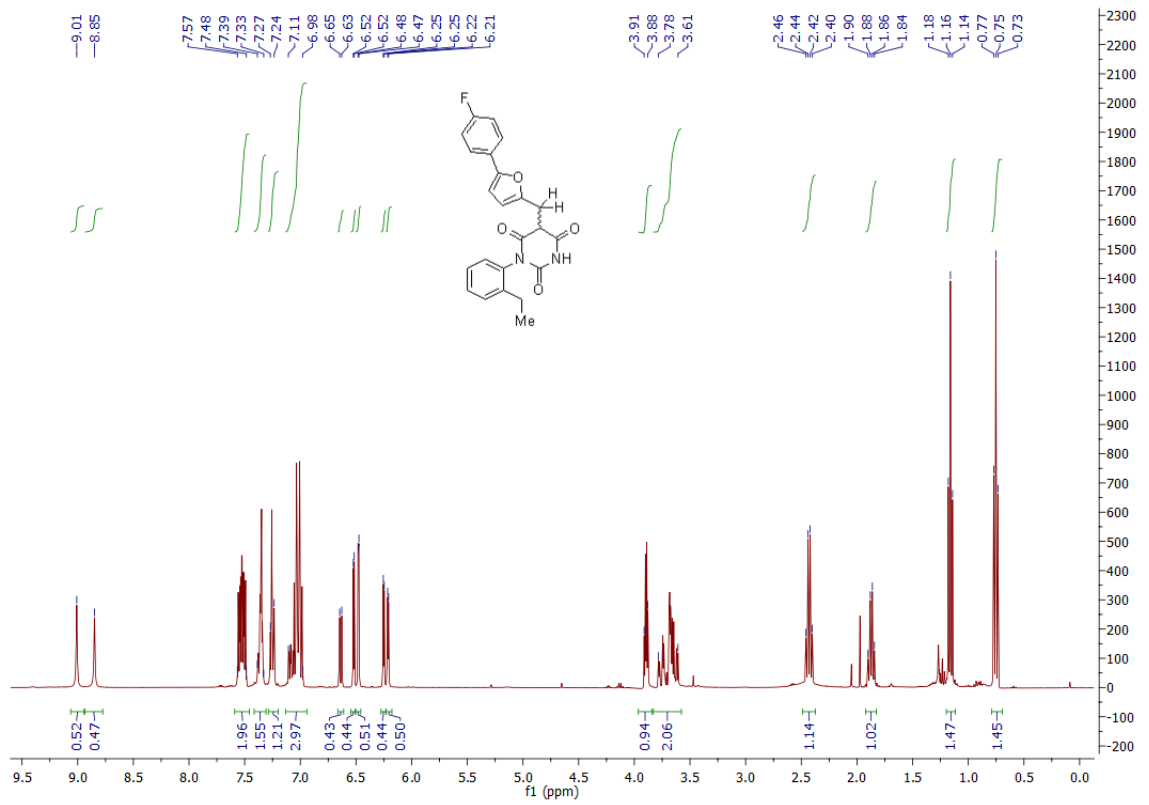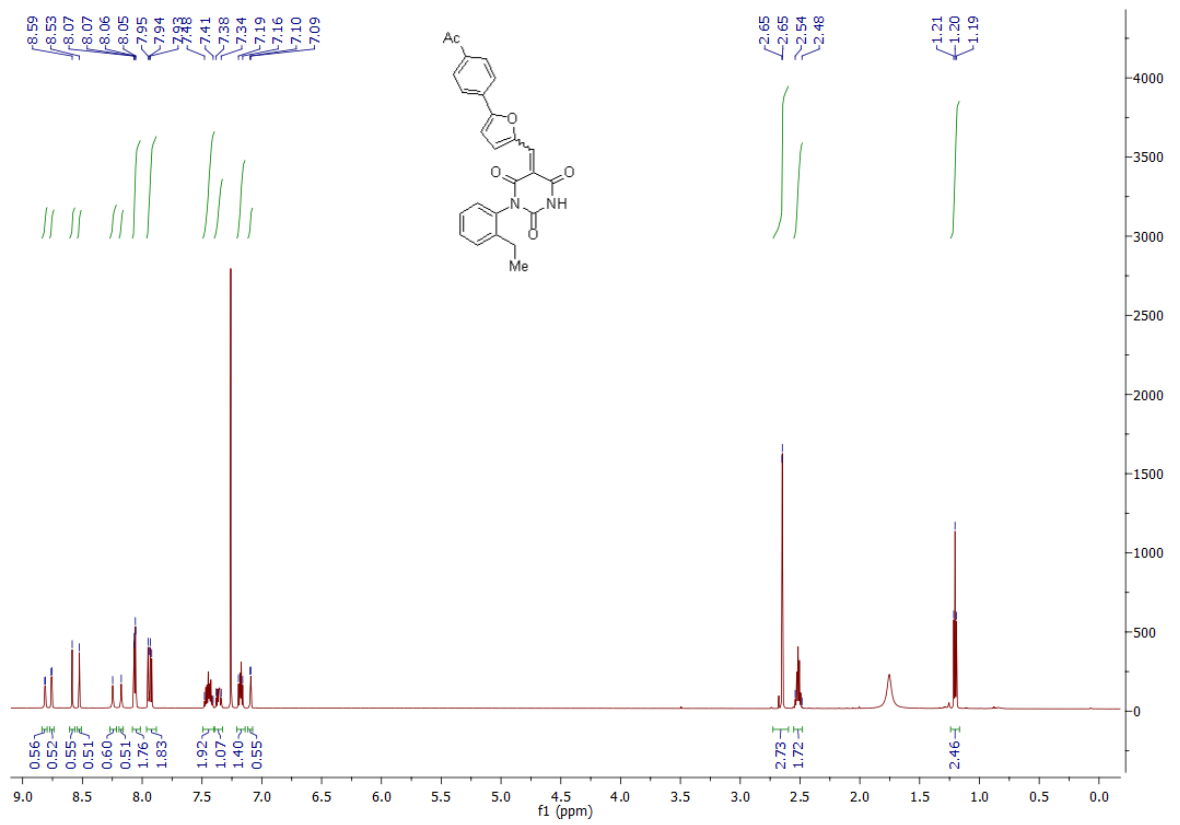

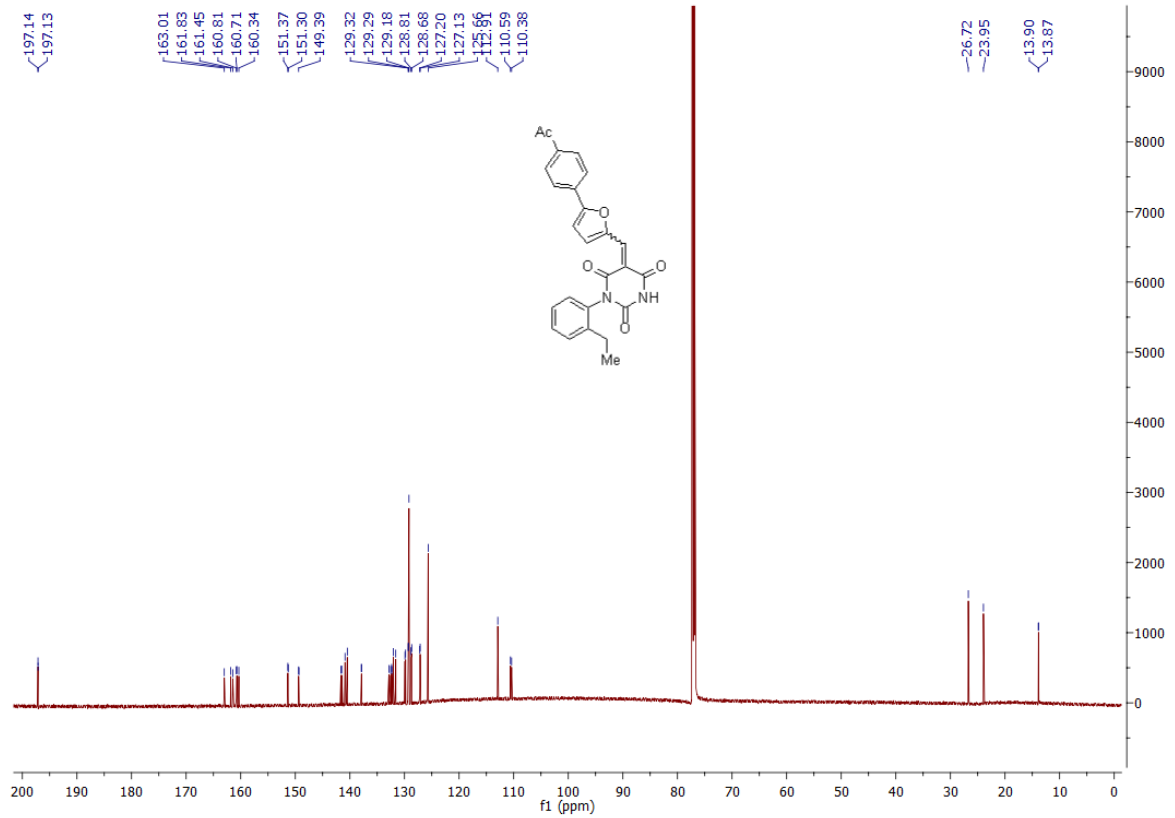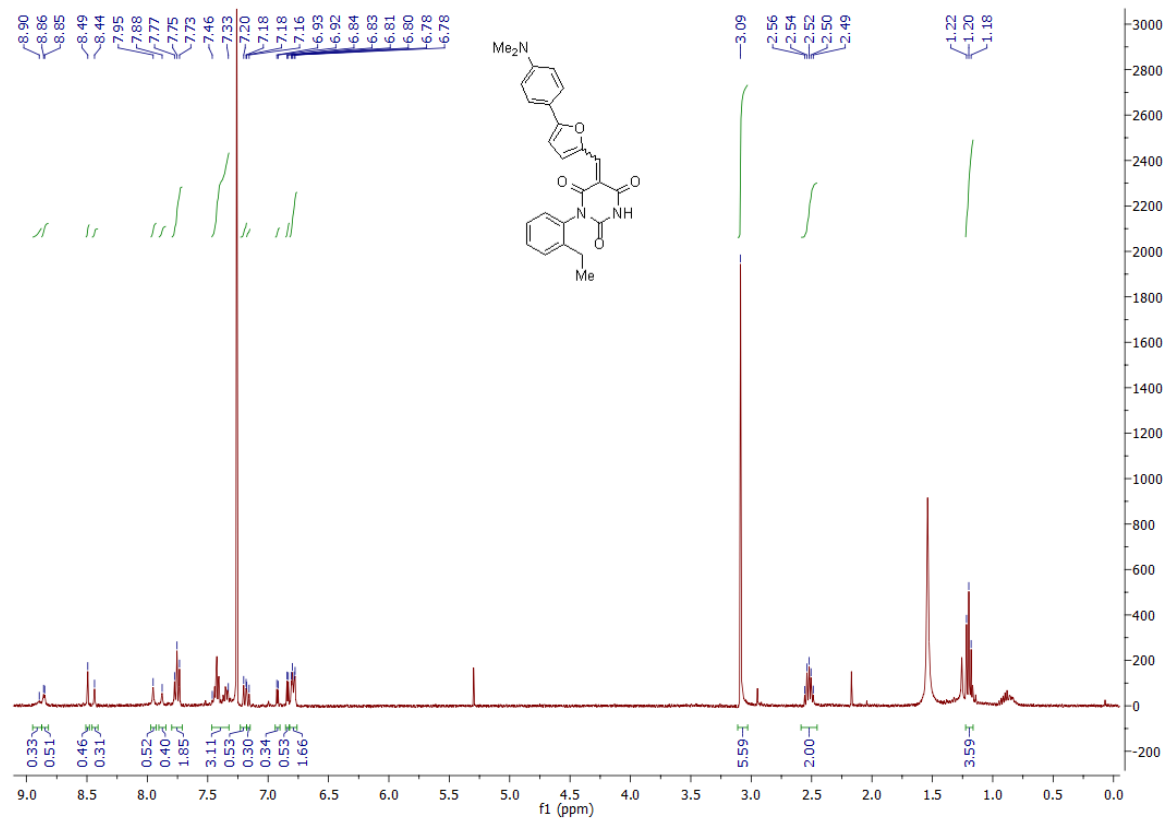

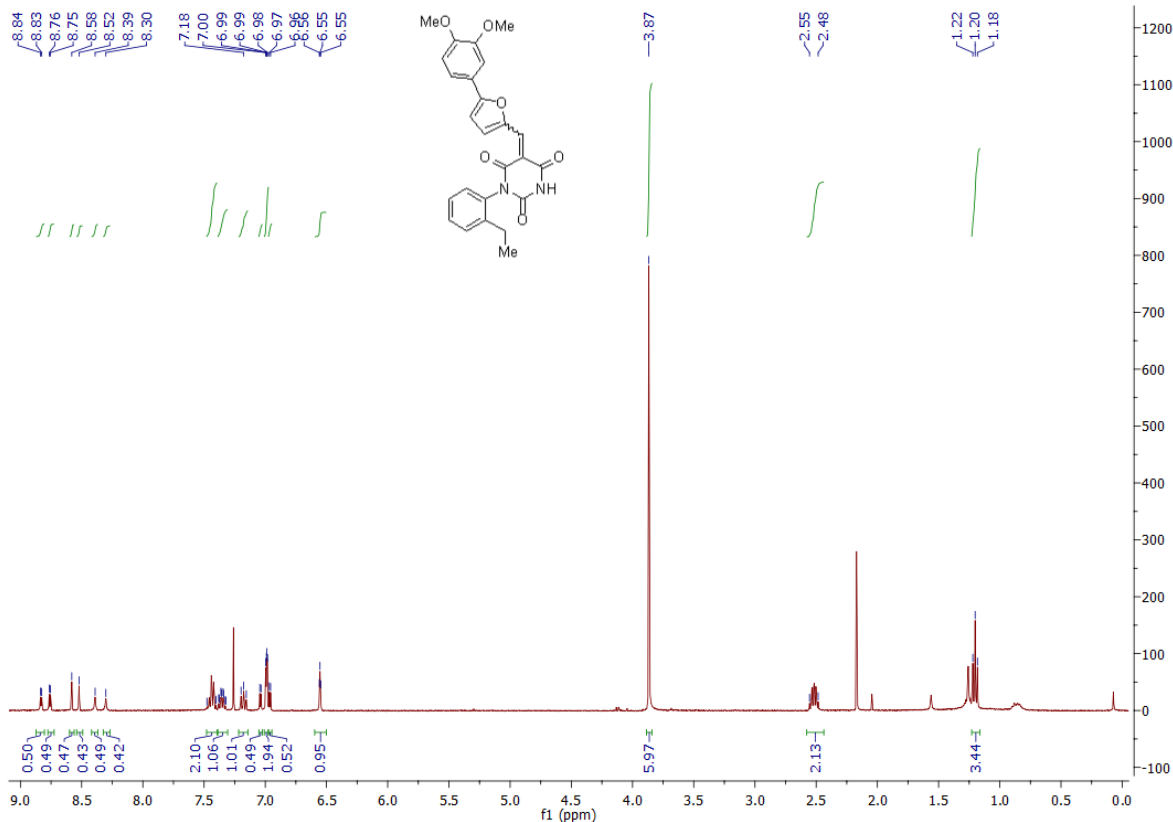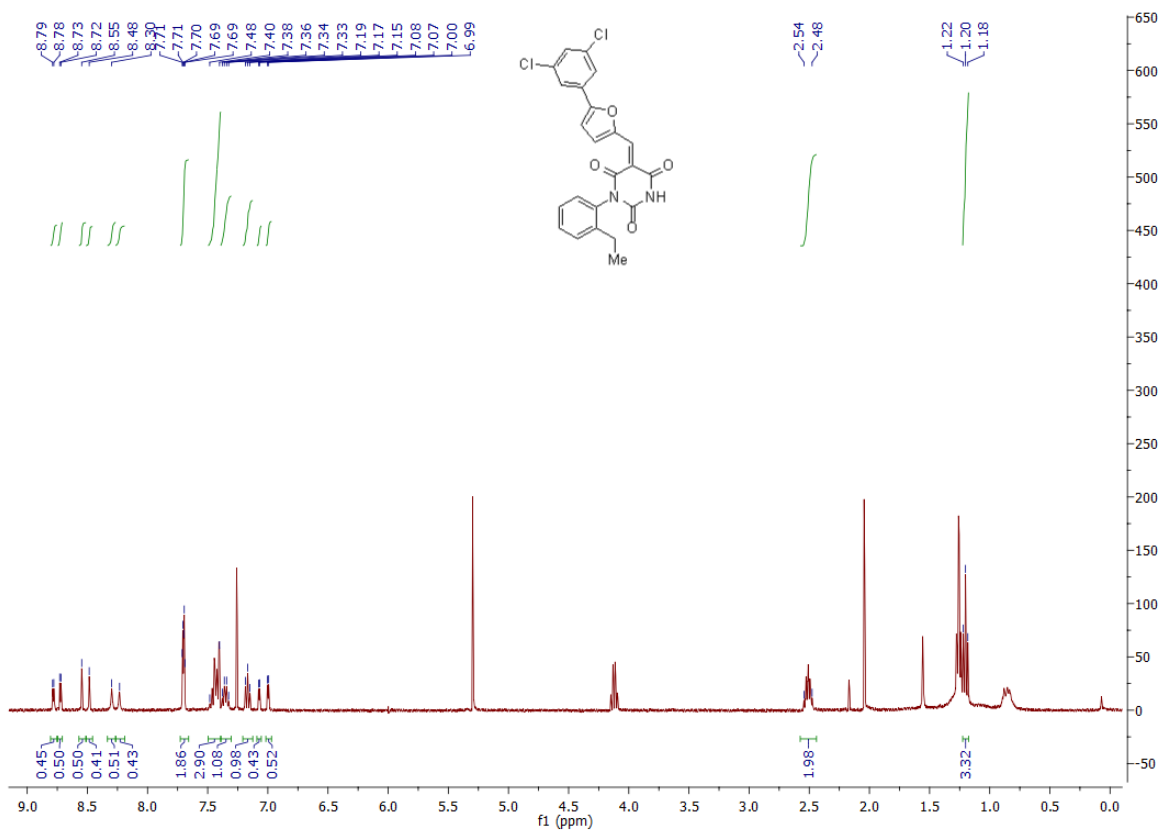



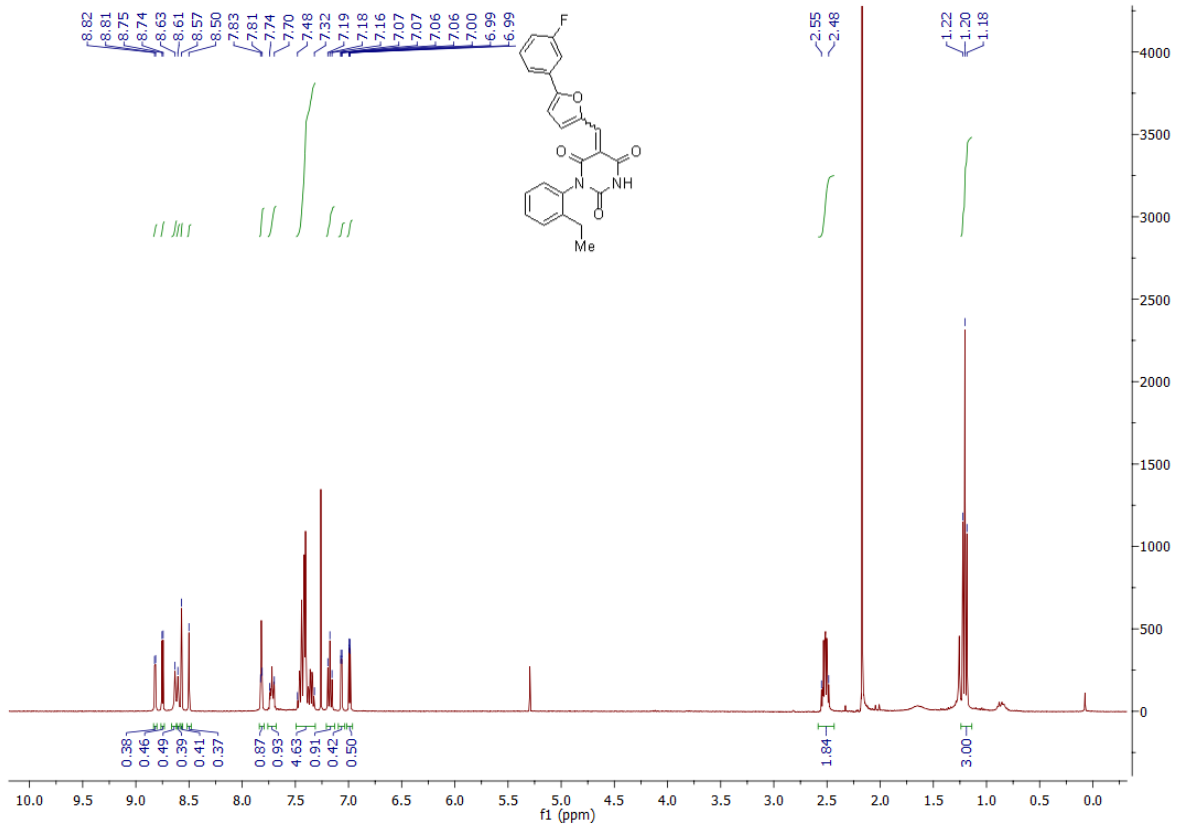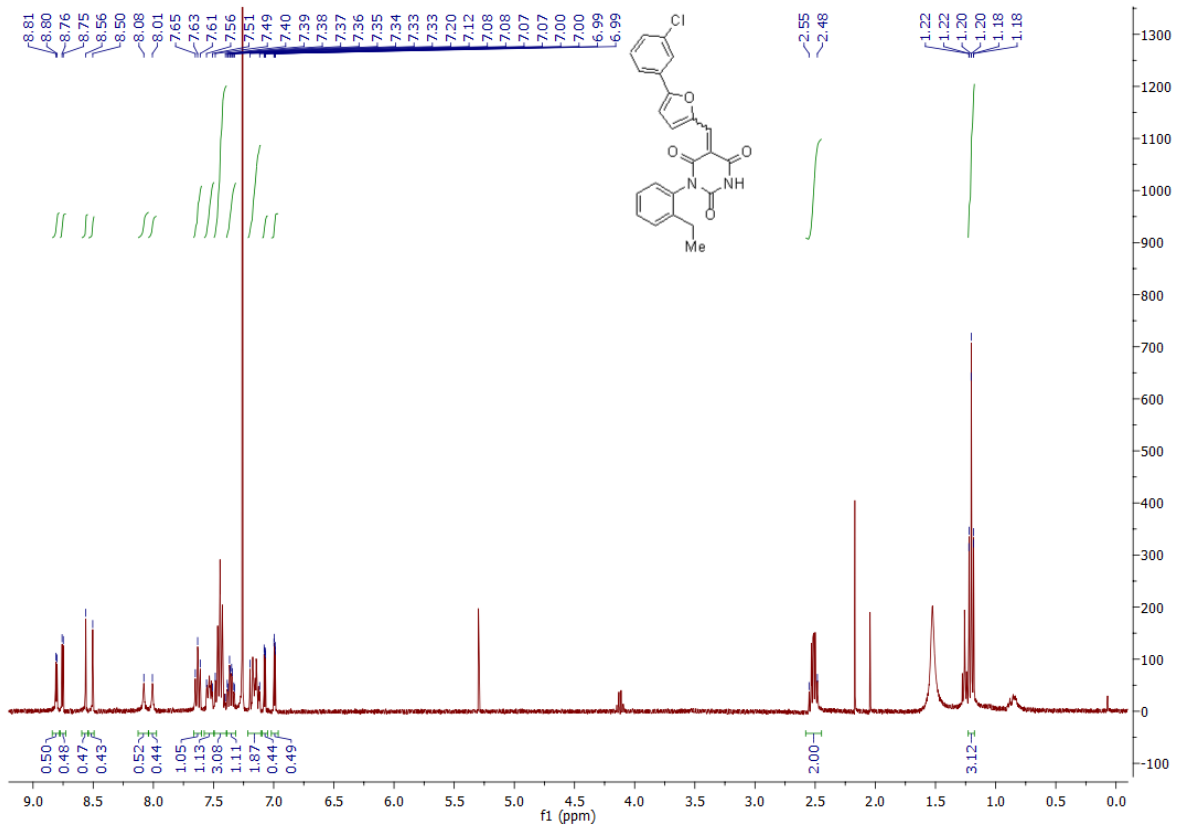

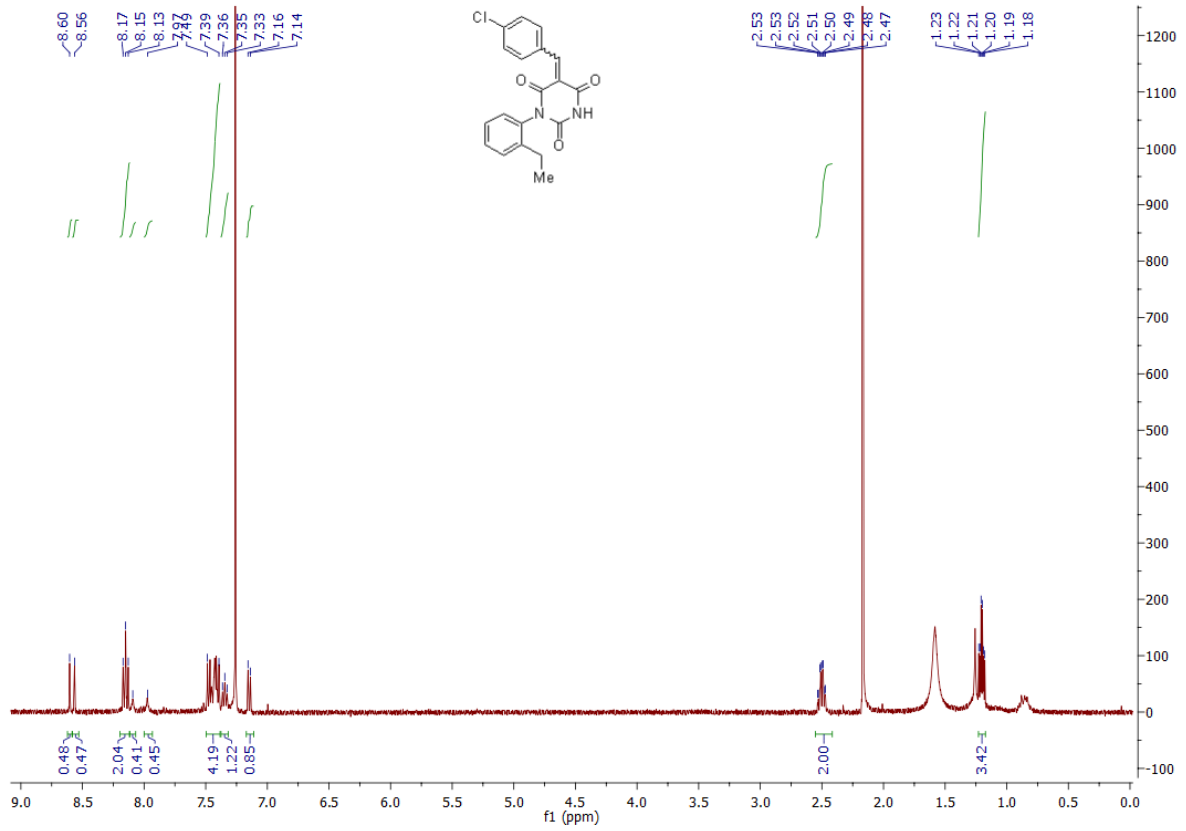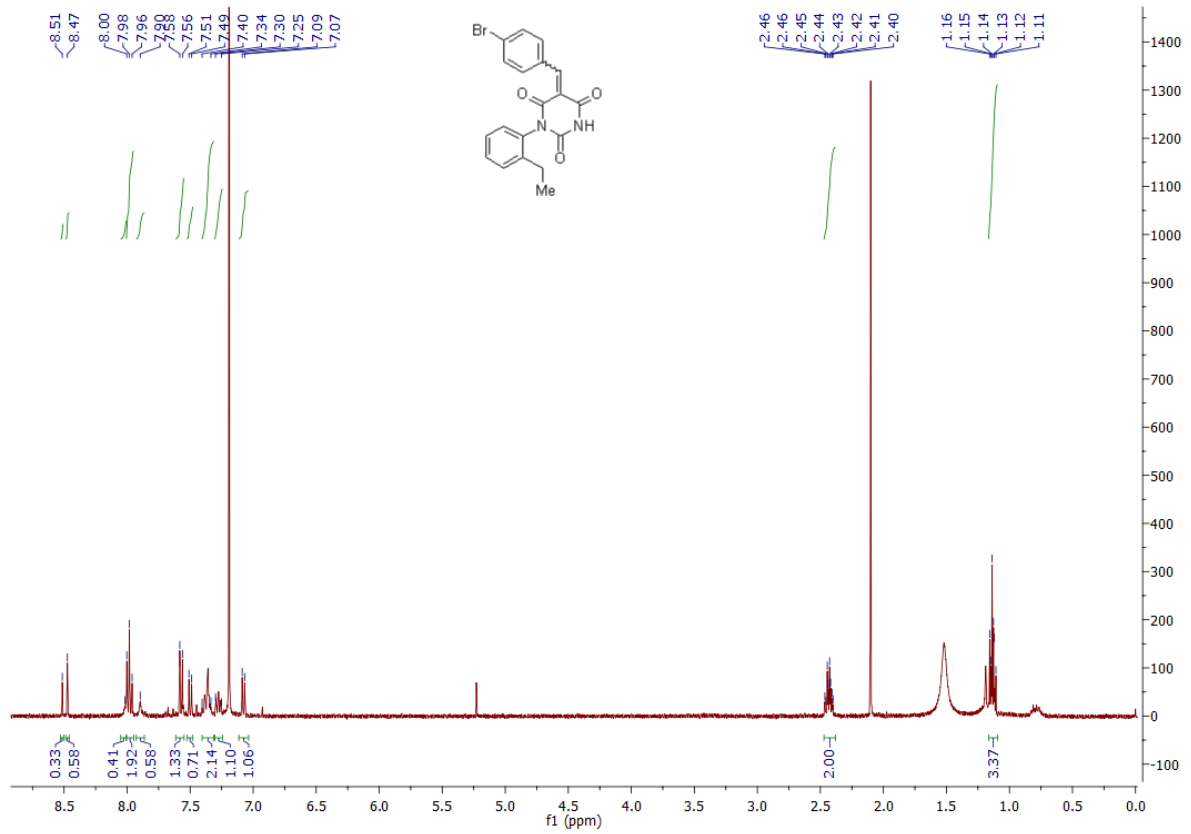

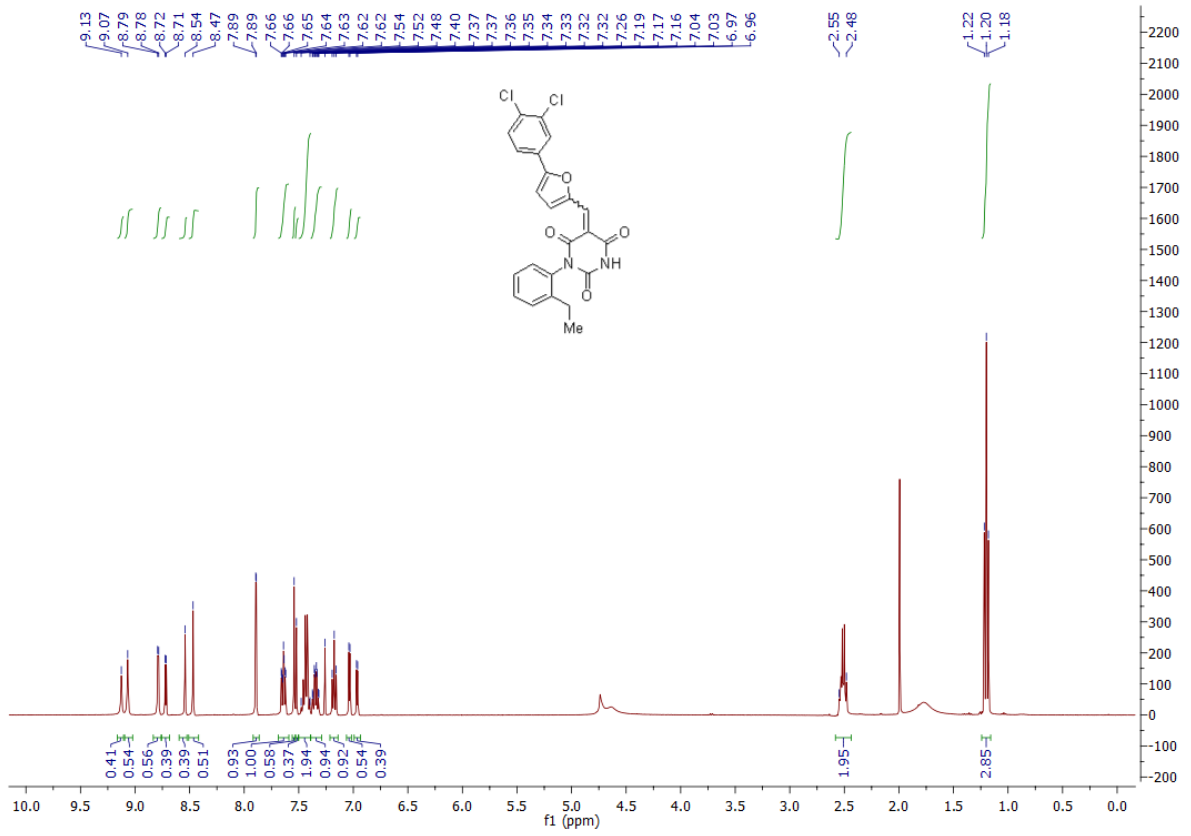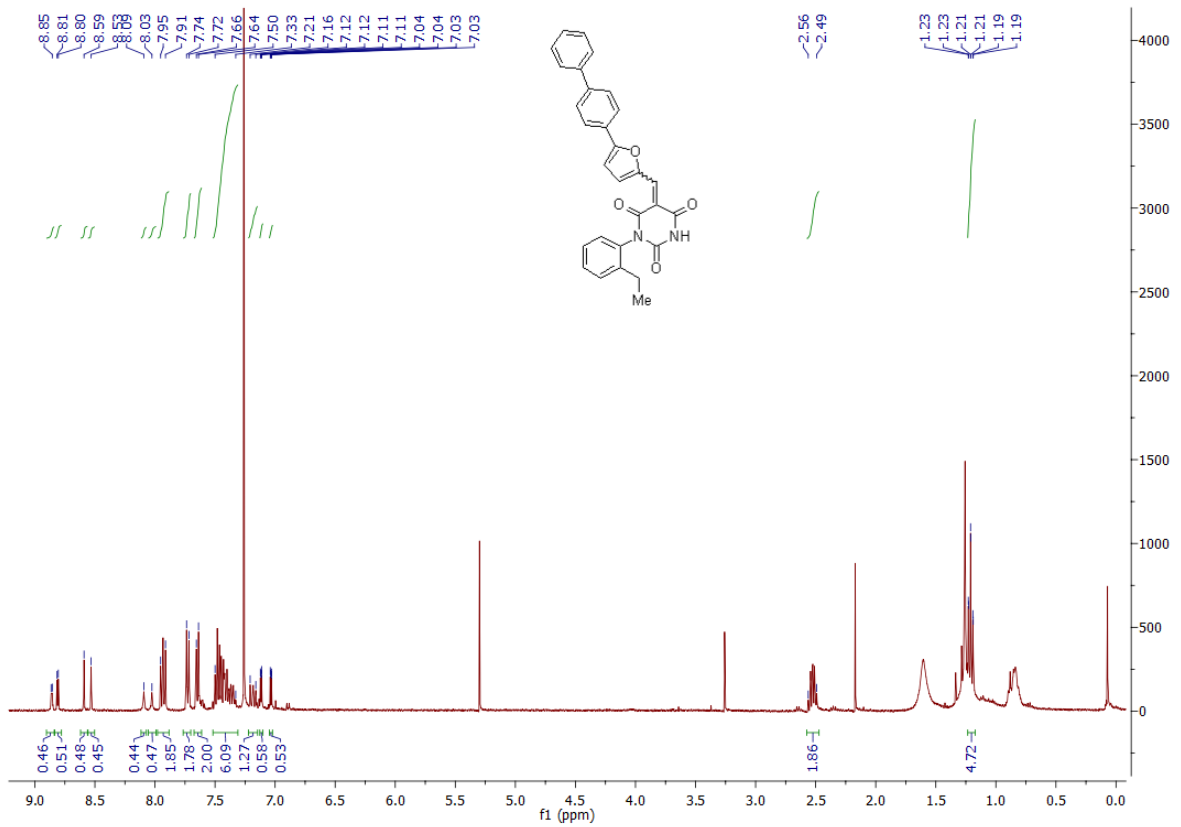

Supplement: elife-23533-fig6-data1.pdf [file elife-23533-fig6-data1.pdf]
